# Supplementary material for: A T-type channel-calmodulin complex triggers αCaMKII activation
Source: PubMed Central journal article supplement (PMC5553682; doi:10.1186/s13041-017-0317-8), 2017-08-11

Cav3.1 pore mutant, 2 mM Ca<sup>2+</sup>

- NaCl 130 mM, 2 mM Ca<sup>2+</sup>
- NMDG 130 mM, 2 mM Ca<sup>2+</sup>

$V_a = -36.3 \pm 1.12 \text{ mV (7)}$

$V_h = -63.3 \pm 1.12 \text{ mV (7)}$

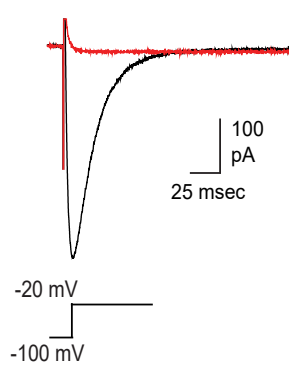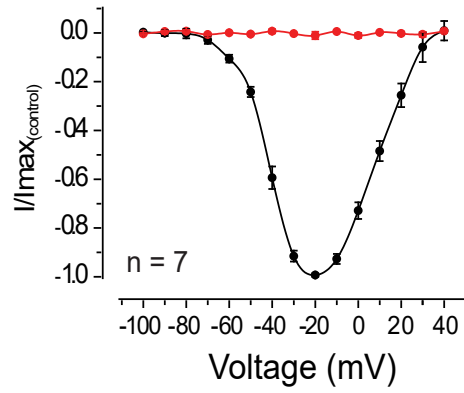

Supplement: 13041_2017_317_MOESM3_ESM.pdf [file 13041_2017_317_MOESM3_ESM.pdf]
