# Supplementary material for: A T-type channel-calmodulin complex triggers αCaMKII activation
Source: PubMed Central journal article supplement (PMC5553682; doi:10.1186/s13041-017-0317-8), 2017-08-11

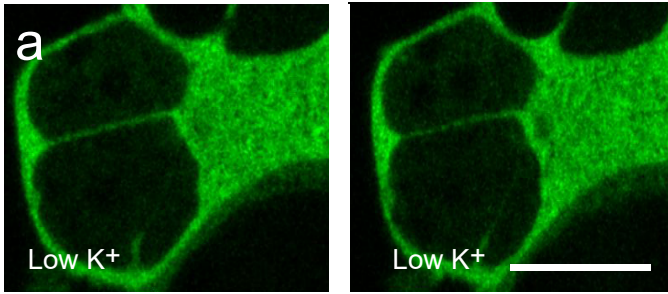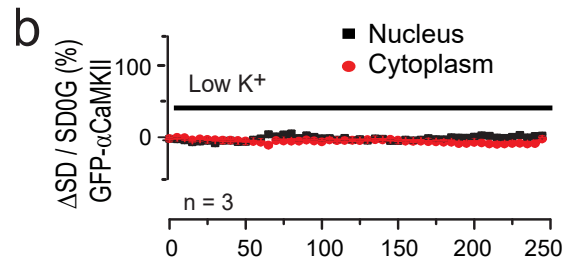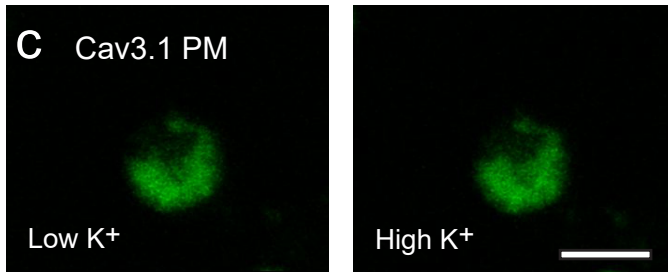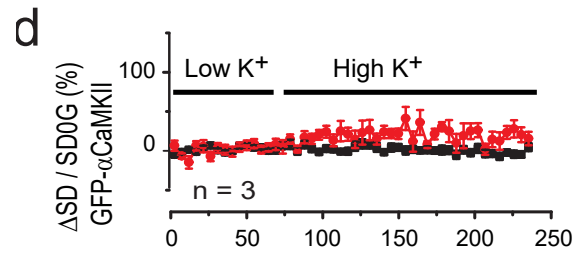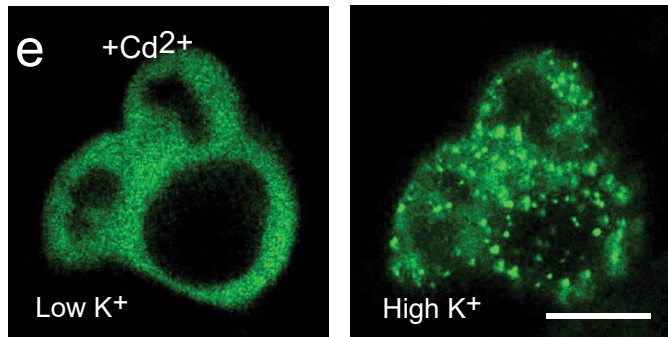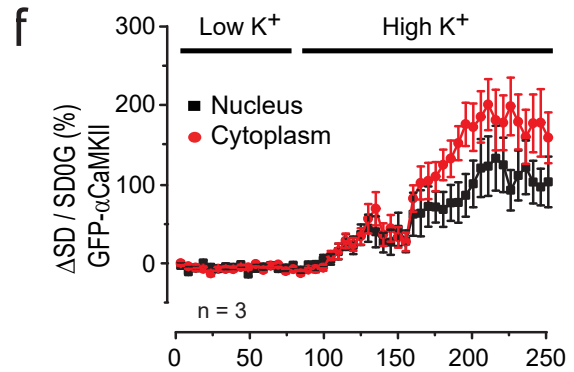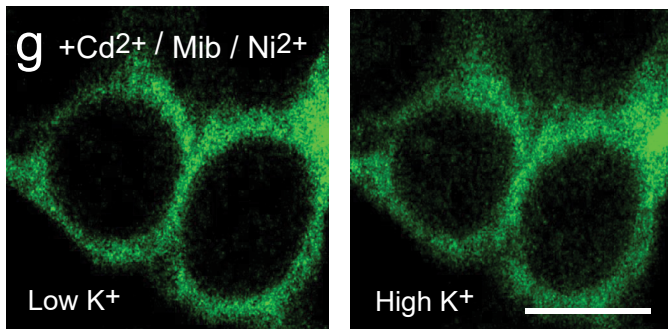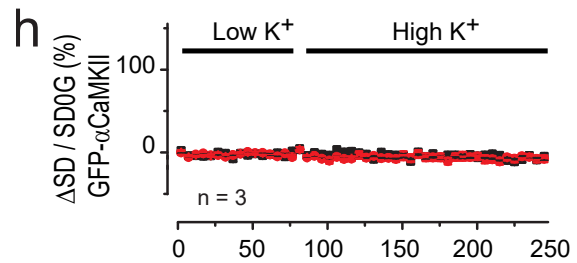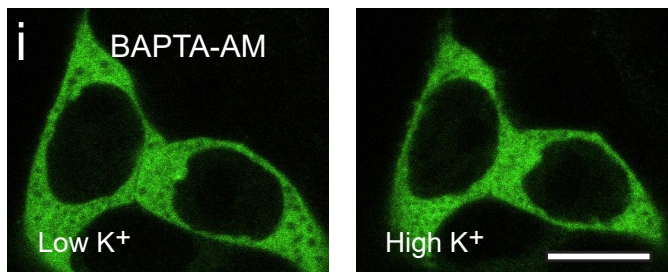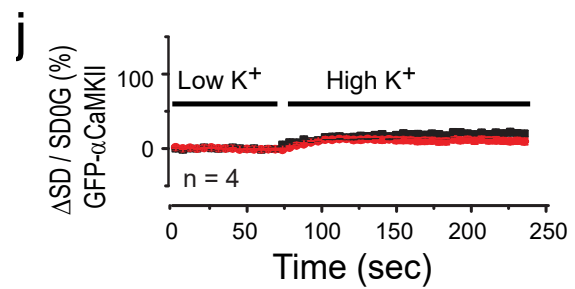

Supplement: 13041_2017_317_MOESM5_ESM.pdf [file 13041_2017_317_MOESM5_ESM.pdf]
